# Supplementary material
Source: Springer Nature journal article supplement (https://www.springermedizin.de/resource/supplementary/12883_2009_356_MOESM3_ESM.pdf/9455220)

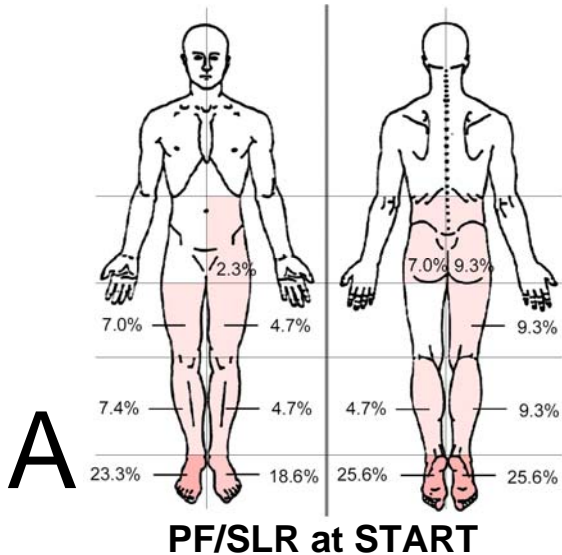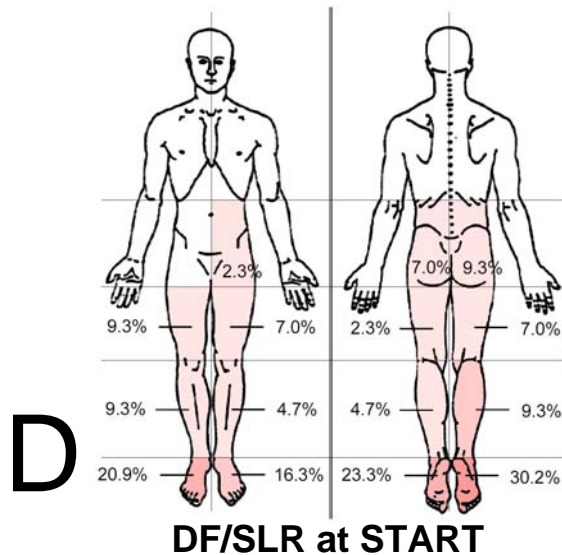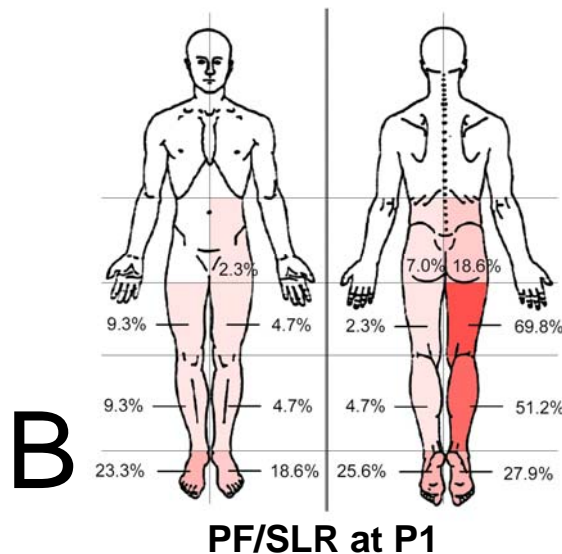

|         |
|---------|
| 91-100% |
| 81-90%  |
| 71-80%  |
| 61-70%  |
| 51-60%  |
| 41-50%  |
| 31-40%  |
| 21-30%  |
| 11-20%  |
| 1-10%   |
| 0%      |

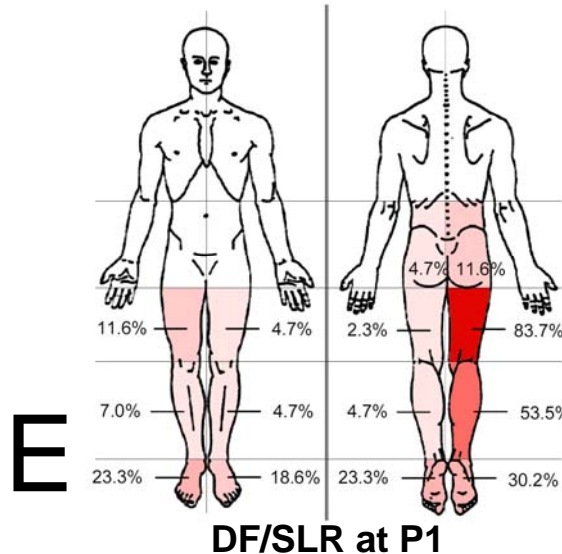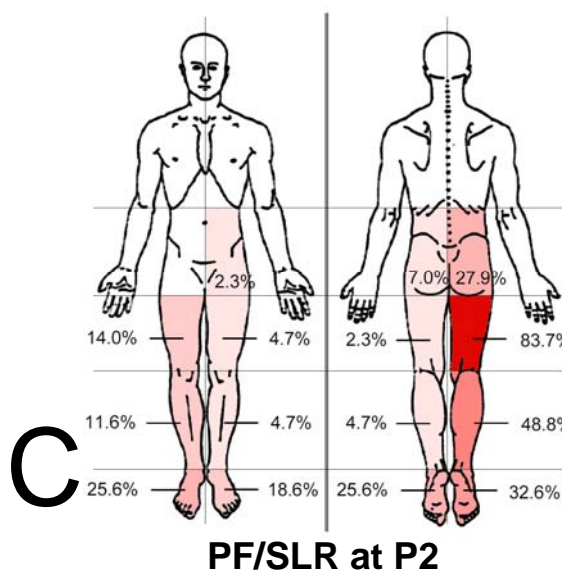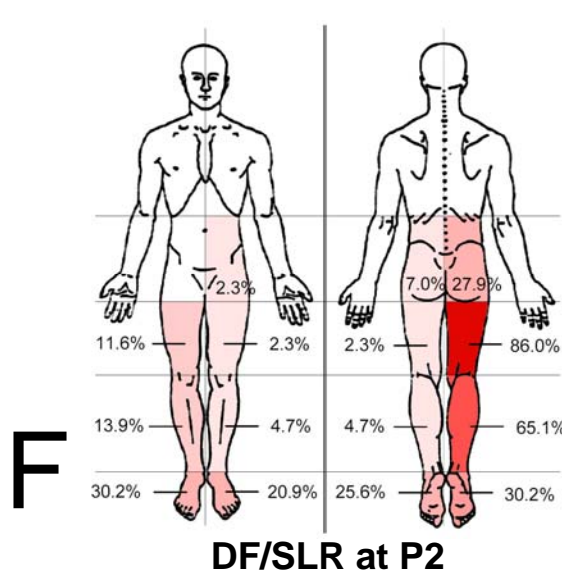

Supplement: MOESM3 [file 9455220]
